# Supplementary material for: Two-step pyrolysis of Mn MIL-100 MOF into MnO nanoclusters/carbon and the effect of N-doping
Source: Royal Society of Chemistry journal article supplement (doi:10.1039/d1ta10590f), 2022-01-01
Supplement: d1ta10590f1.pdf [file d1ta10590f1.pdf]

## Supporting information

### Two-Step Pyrolysis of Mn MIL-100 MOF into MnO Nanoclusters/Carbon and the Effect of N-doping

Yating Hu,<sup>\*a,b</sup> Chi Song,<sup>b</sup> Changjian Li,<sup>\*c,d</sup> and John Wang<sup>\*a</sup>

- a. Department of Materials Science and Engineering, National University of Singapore, 9 Engineering Drive 1, 117576, Singapore. Email: yating.hu@u.nus.edu, msewangj@nus.edu.sg.
- b. Function Hub, Hong Kong University of Science and Technology (Guangzhou), S&T Building, Nansha IT Park, Guangzhou, 511458, China. Email: yating.hu@u.nus.edu
- c. Department of Materials Science and Engineering, Southern University of Science and Technology, 518055 Shenzhen, Guangdong, China. Email: licj@sustech.edu.cn.
- d. Guangdong Provincial Key Laboratory of Functional Oxide Materials and Devices, Southern University of Science and Technology, 518055 Shenzhen, Guangdong, China.

## Experimental Section

### 1. Chemicals

Trimesic acid (95%),  $\text{Mn}(\text{NO}_3)_2 \cdot 4\text{H}_2\text{O}$  ( $\geq 97\%$ ), methanol (99.9%), ethanol (99.5%), dicyandiamide (99%) and boron nitride (98 %) were all purchased from Sigma-Aldrich.

### 2. Synthesis of Mn MIL-100 MOF

Mn MIL-100 was synthesized following Stoke's work with some modifications (composition of the desolvated form of Mn MIL-100 as  $[\text{Mn}_3(\text{O})(\text{BTC})_2]$ ).<sup>1</sup>

2 mmol of trimesic acid and  $\text{Mn}(\text{NO}_3)_2 \cdot 4\text{H}_2\text{O}$  was dissolved in 10 mL of *methanol* in a glass vial. The mixture is dissolved and mixed by stirring for 30 mins. The mixture is then transferred into a hydrothermal autoclave liner of 45 ml in volume. The solution was then heat-treated in a sealed stainless steel autoclave at 125 °C for 2 h. After cooling down, a brown color solid is obtained and washed with ethanol for three times. The sample is stored in ethanol.

### 3. N-doping of the Mn MIL-100 MOF

3 mmol dicyandiamide and 0.5 mmol Mn MIL-100 were mixed in 20 ml methanol and the mixture went through hydrothermal treatment in a 45 ml autoclave liner for various durations at 90 °C. The product is then washed with ethanol for three times.

### 4. In-situ Studies

Thermogravimetric analysis–mass spectrometry (TG-MS) test of the Mn MIL-100: TG-MS was conducted on a Mettler Toledo thermogravimetric analyzer, coupled with a Pifzer mass spectrometry, which is capable of qualitative analysis of evolved gases during thermal decomposition. Range of mass detected: 1-100 AMU (atomic mass unit). About 6-10 mg of Mn MIL-100 was put in an aluminum pan inside the chamber. Then, the sample was heated to 700 °C at the ramp rate of 5 °C/min in  $\text{N}_2$ , flowing at 100 mL/min.  $\text{N}_2$  is flushed for 30 min before the heating started. Signals *vf* below AMUs were collected while only the detected ones are shown in the results: 2 ( $\text{H}_2$ ), 16 ( $\text{CH}_4$ ), 17 ( $\text{NH}_3$ ), 18 ( $\text{H}_2\text{O}$ ), 28 ( $\text{N}_2$ ), 30 ( $\text{NO}$ ), 32 ( $\text{O}_2$ ), 44 ( $\text{CO}_2$ ), 46 ( $\text{NO}_2$ ), 55(Mn), 78( $\text{C}_6\text{H}_6$ ).

*In-situ* scanning transmission electron microscopy (STEM) study of the Mn MIL-100's pyrolysis in the STEM chamber: *In-situ* STEM study was conducted on a JEOL ARM200f microscope at an acceleration voltage of 200 kV, using the *in-situ* heating and biasing holder (DENSsolutions) with heating MEMS (Micro-electromechanical system) chips with  $\text{Si}_3\text{N}_4$  membrane. Powder of Mn MIL-100 was well dispersed in ethanol by ultrasonication, and then dropped onto the chip. The temperature accuracy is within 5%. The base vacuum is about  $1\text{E}-7$  mbar.

*In-situ* XRD study of the Mn MIL-100's pyrolysis in  $\text{N}_2$  gas: *In-situ* XRD study was conducted on a PANalytical X'Pert PRO using  $\text{Cu K}\alpha$  radiation. Powder of Mn MIL-100 was well dispersed in ethanol by ultrasonication, and then dropped onto a silicon wafer that was placed on the XRD sample holder. The heating cell is vacuumed to  $1\text{E}-5$  mbar before  $\text{N}_2$  is filled. The sample is being heated up from room temperature to 900 °C with  $\text{N}_2$  flowing at 50 mL/min. The volume of the cell is about 100 mL. XRD was tested when the set temperature is reached. Ramp rate of 5°C/min is used and the testing

time at each temperature is about 7 min.

## 5. Pyrolysis/carbonization of the MOFs

About 60-100 mg of the as-synthesized Mn MIL-100 or the N-doped Mn MIL-100 powder was placed in an alumina crucible. The crucible was then placed in a tube furnace connected with mechanical and turbo pumps. A vacuum level of  $\sim 5E-4$  mbar was obtained before filling with  $N_2$  gas to atmospheric pressure. The above degassing/ $N_2$ -filling cycle was repeated for 3 times. Then, the MOF went through heat-treatment with  $N_2$  flowing at 300 mL/min. Ramp rate of 5 °C/min was used to reach 700 °C and duration of holding at 700 °C is 2 h. The product was retrieved upon cooling down to room temperature. The table below shows the sample nomenclature based on N-doping and heat-treatment conditions.

Table S1. Nomenclature of samples based on N-doping level and heat-treatment.

| Sample name | Starting material | Treatment             | N at% |
|-------------|-------------------|-----------------------|-------|
| N-MOF1      | Mn MIL-100        | 12 h at 90°C          | 3.5   |
| N-MOF2      |                   | 18 h at 90°C          | 4.5   |
| N-MOF3      |                   | 24 h at 90 °C         | 6.3   |
| MnO/C       |                   |                       | 0     |
| MnO/NC1     | 3.5 at% N-doping  | 2 hr at 700 °C, $N_2$ | 3.1   |
| MnO/NC2     | 4.5 at% N-doping  |                       | 4.2   |
| MnO/NC3     | 6.3 at% N-doping  |                       | 4.7   |

## 6. Characterizations

The as-synthesized Mn MIL-100, N-doped Mn MIL-100 and the carbonized samples were then analyzed using transmission electron microscopy (TEM), X-ray diffraction (XRD), energy dispersive X-ray analysis (EDX), CHNS analyzer, inductively coupled plasma-optical emission spectrometer (ICP-OES). XRD patterns were obtained using a Bruker AXS X-ray powder diffractometer (D8 Advance, Cu  $K\alpha$ ,  $\lambda = 0.15418$  nm). Elemental analysis was conducted by using the CHNS (Carbon, Hydrogen, Nitrogen and Sulphur) analyzer (Elementar vario MICRO cube) for carbon, nitrogen and hydrogen contents and ICP-OES (Perkin Elmer Optima 5300DV) for manganese contents. Field-emission scanning electron microscopy (SEM) were conducted using a SUPRA 40 ZEISS. TEM imaging were conducted using a JEOL JEM-2010 microscope under an acceleration voltage of 200 kV. Specific surface area and pore size distribution were calculated from  $N_2$  adsorption/desorption measurement (Micromeritics 3Flex). Thermal gravimetric analysis (TGA) of the Mn MIL-100 was done using a TA Instruments Q500.

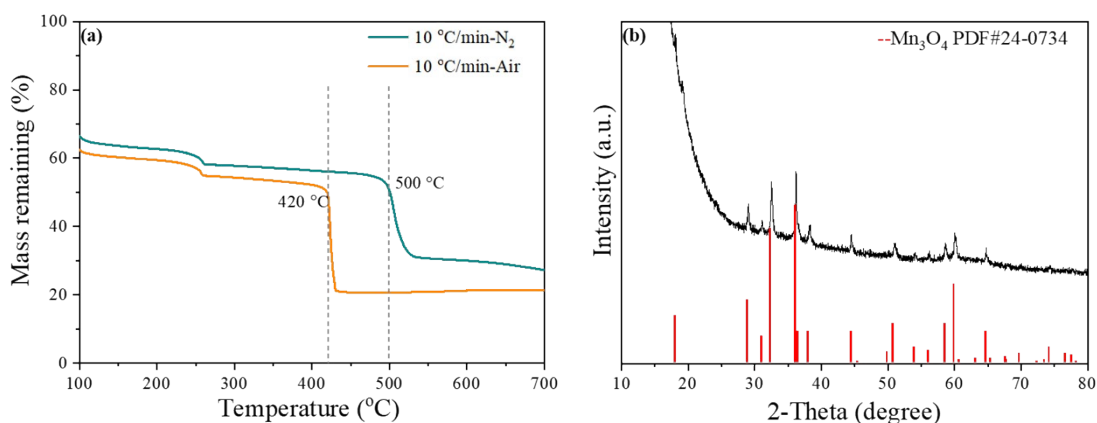

Figure S1. (a) TGA results in air and N<sub>2</sub> with a ramping rate of 10 °C/min and gas flow of 100 mL/min. (b) XRD result of the Mn MIL-100 carbonized in air at 450 °C for 2h.

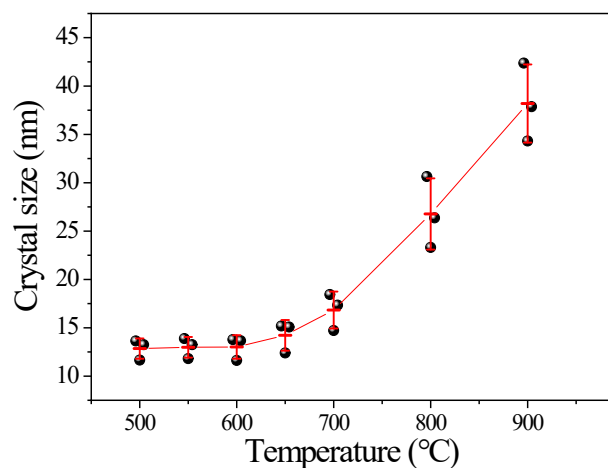

Figure S2. Crystal size calculated from *in-situ* XRD results using Debye-Scherrer's formula, based on the peaks at 34.9, 40.5 and 58.7 degree of 2 theta.

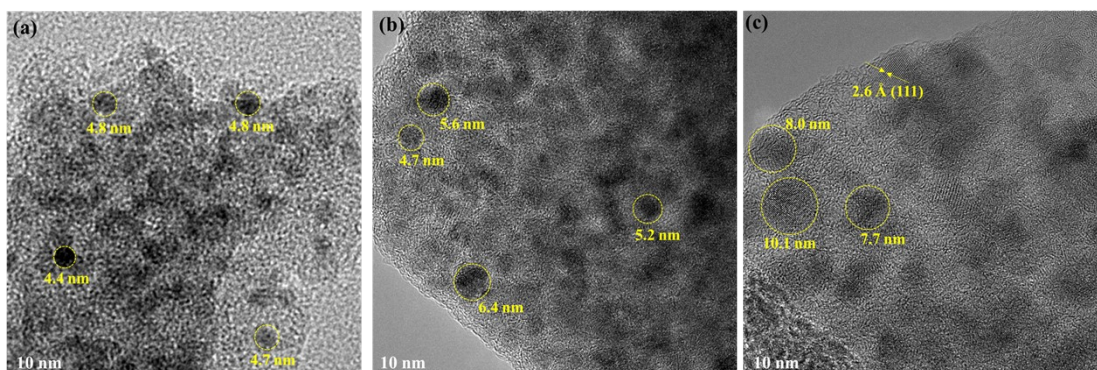

Figure S3. High-resolution TEM images of the Mn MIL-100 pyrolyzed/annealed at a) 700 (Sample MnO/C), b) 800 and c) 900 °C, showing the particle sizes of the MnO nanoparticles and the lattice fringe corresponds to the (111) plan of MnO crystal (PDF

#07-0230).

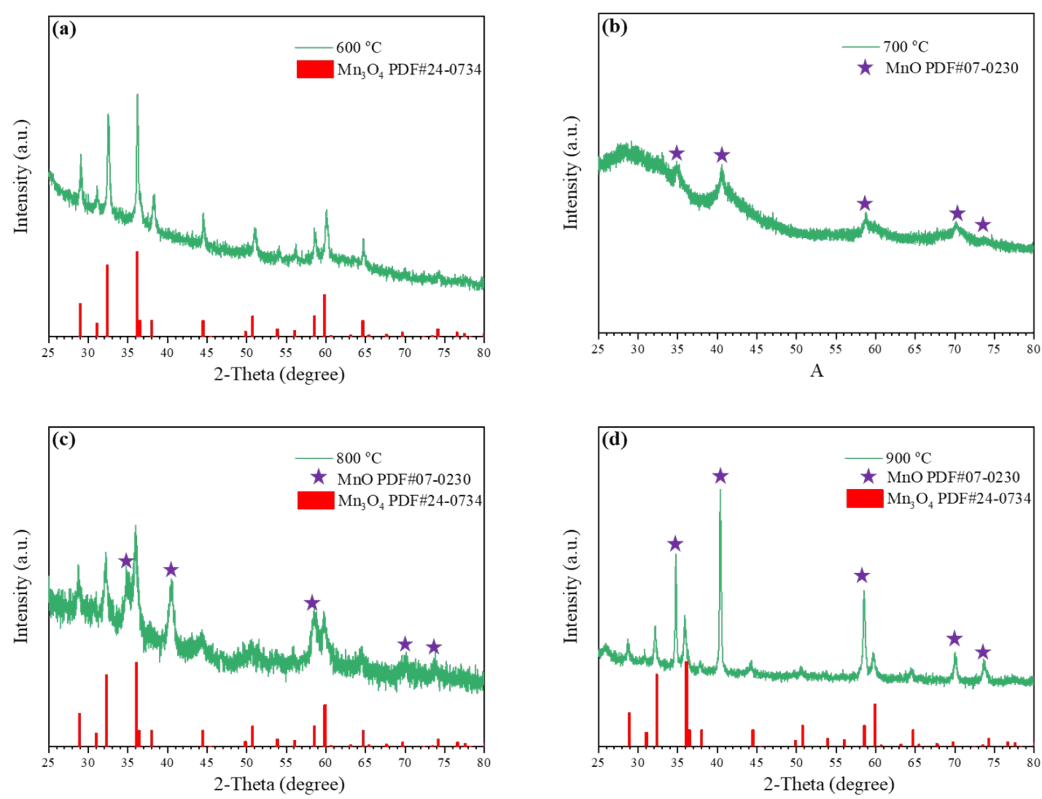

Figure S4. XRD results of the Mn MIL-100 pyrolyzed/annealed at a) 600, b) 700 (Sample MnO/C), c) 800 and d) 900 °C.

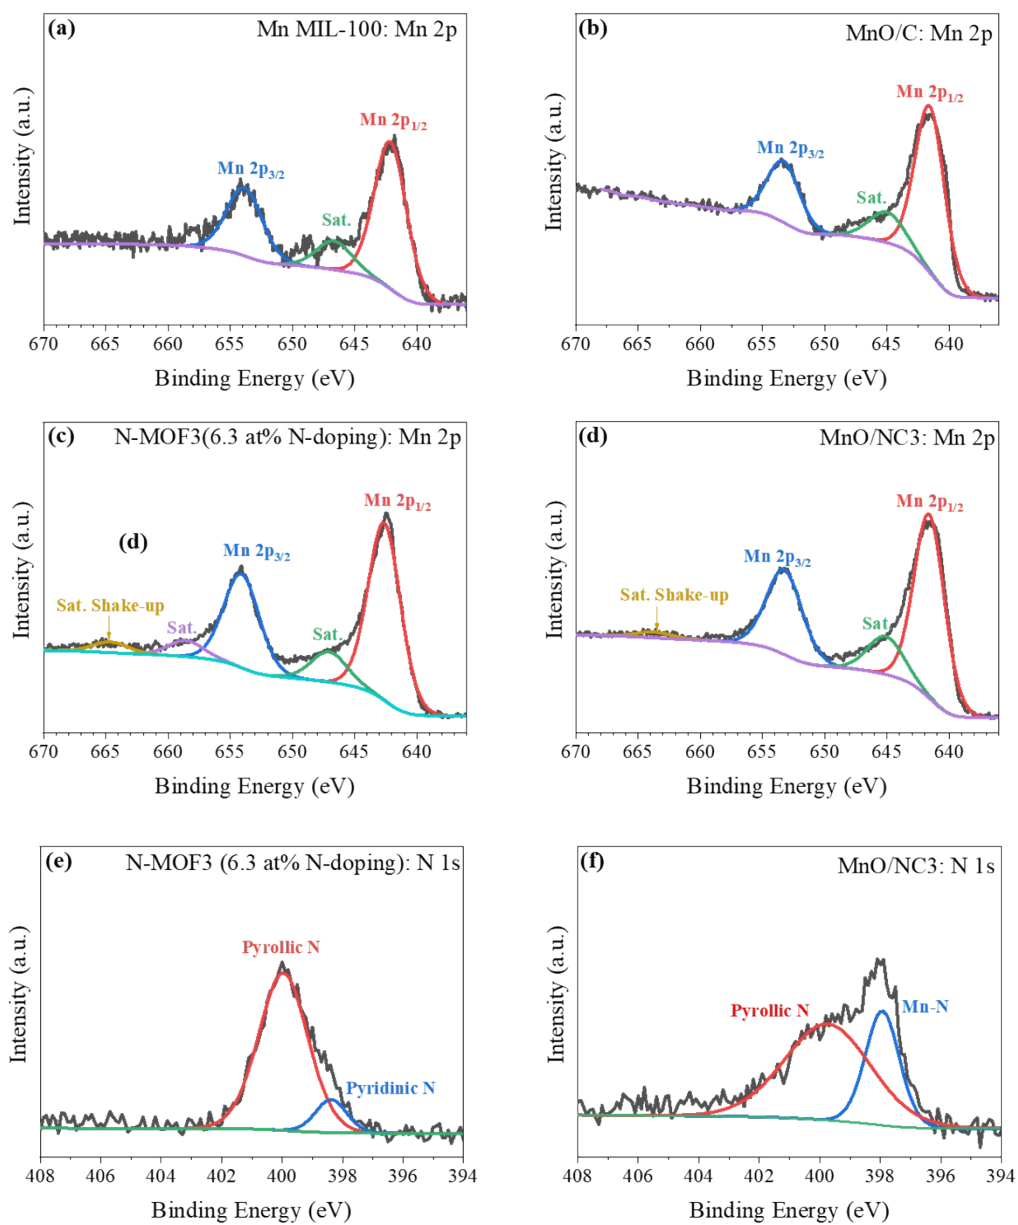

Figure

e S5. XPS results of Mn 2p for (a) Mn MIL-100, (b) MnO/C, (c) N-MOF3 and (d) MnO/NC3; N 1s for (e) N-MOF3 and (f) MnO/NC3.

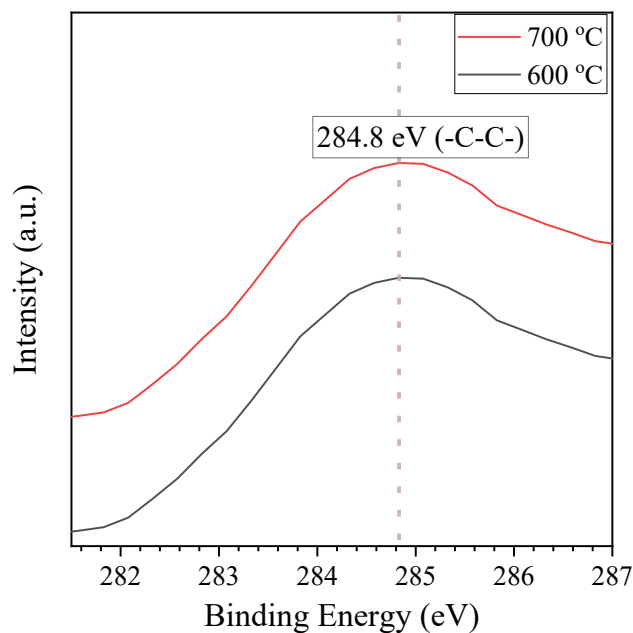

Figure S6. EELS spectrum for carbon 2s during *in-situ* STEM test at 600 and 700 °C.

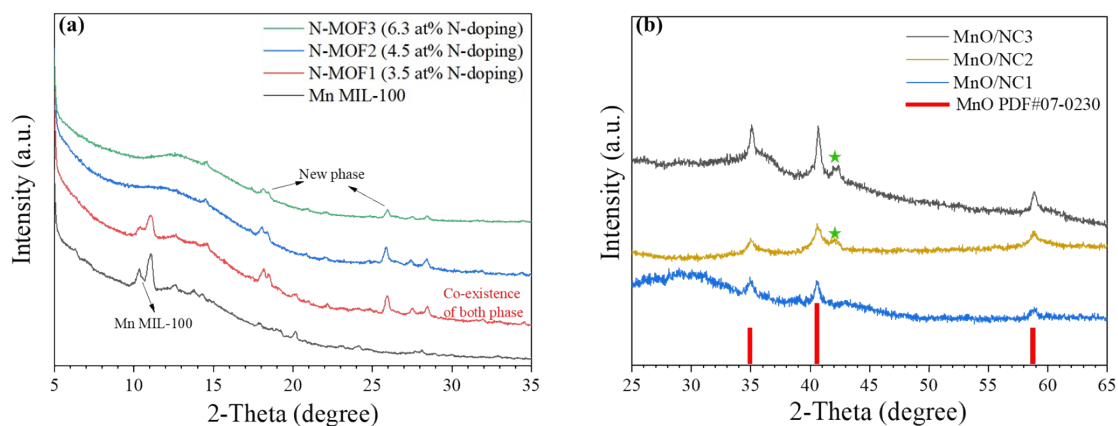

Figure S7. XRD results of (a) N-doped Mn MIL-100 at various doping level;  
 (b) MnO/NC1-3 (The peak at the two-theta angle of 41.9 degree corresponds to  $\text{Mn}_6\text{N}_{2.58}$ ).

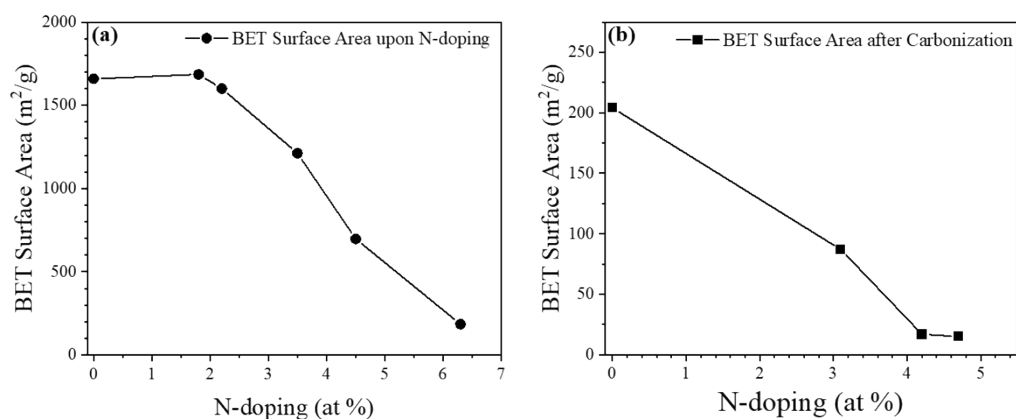

Figure S8. Plot of Brunauer–Emmett–Teller surface area calculated from N<sub>2</sub> adsorption of the N-doped samples and those samples after carbonization vs. the N content in the sample.

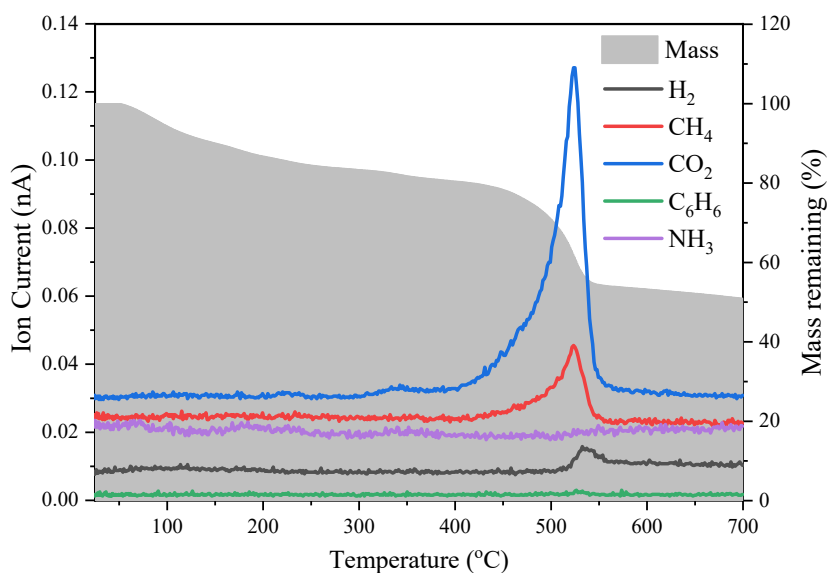

Figure S9. TG-MS result of the 3.5 at% N-doped Mn MIL-100 (Sample N-MOF1) conducted in N<sub>2</sub>, ramping at 5 °C/min.



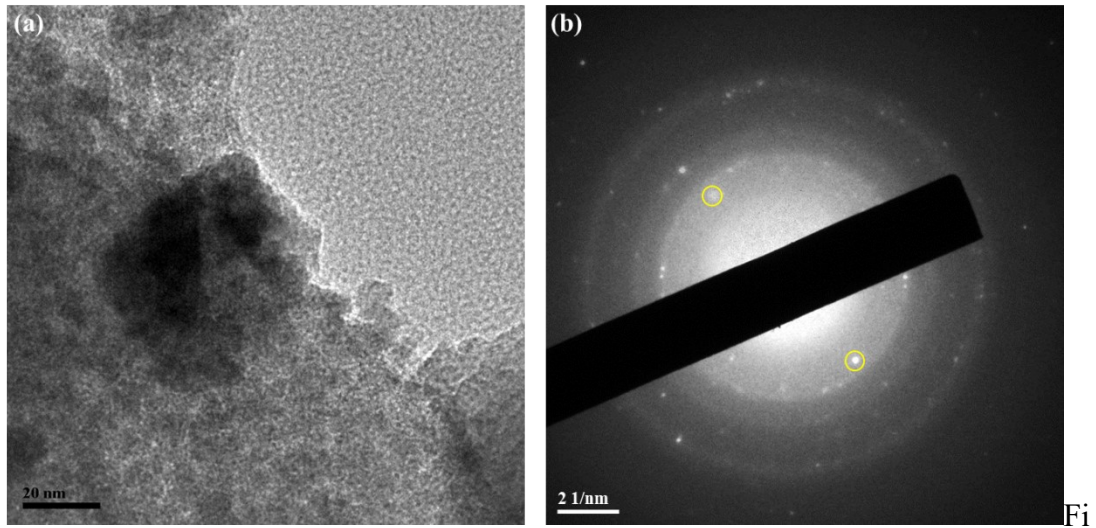

Figure S10. TEM and SAED of the 6.3 at% N-doped sample after carbonization (MnO/NC3-N700)

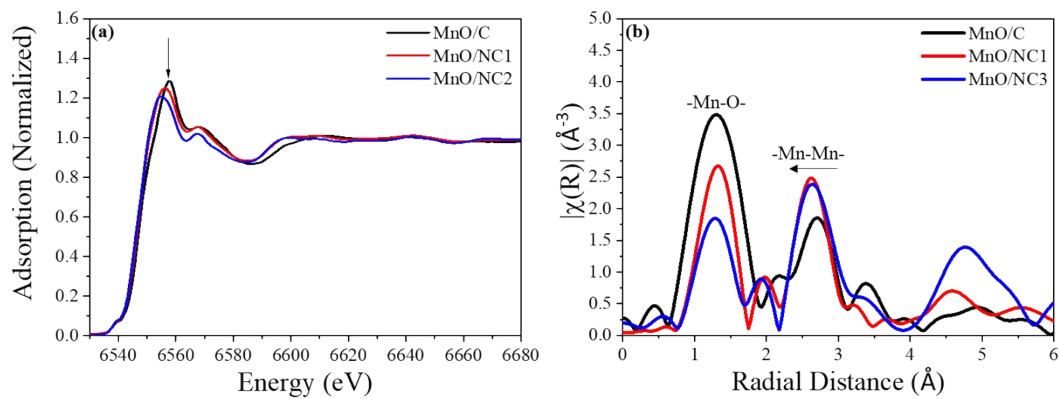

Figure S11. (a) Mn K-edge X-ray absorption near-edge structure (XANES) spectra and (b) Fourier transform of the extended X-ray absorption fine structure (EXAFS) spectra for MnO/C and different level of N-doped MnO/C.

Reference:

1. Reinsch, H. and N. Stock, *CrystEngComm*, 2013. **15**(3): p. 544-550.
